# Supplementary material for: The Polytope Formalism: application to molecular constitution and the prospect of a complete description of Chemical Space
Source: Royal Society of Chemistry journal article supplement (doi:10.1039/d5sc08813e), 2026-01-01

Class: S2B2 with site symmetry point group D2h

Genera included = {1, 2, 3, 4, 5, 6}

1<sup>st</sup> order motions graph:

Graph vertex layout: SpringElectricalEmbedding

Hamiltonian graph? False

Eulerian graph? False

Planar graph? True

Graph radius = 4.

Graph diameter = 4.

Graph density = 0.263736

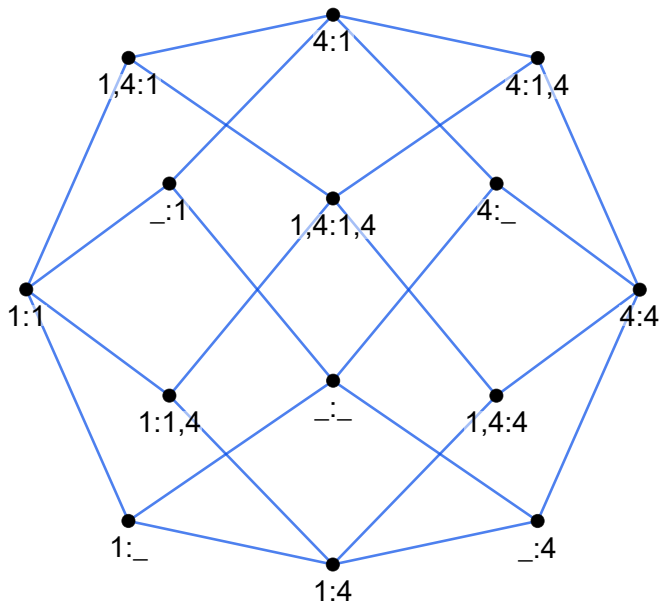

Supplement: d5sc08813e1.zip [file cyclo - addition S2B2_S2B2_genera{1, 2, 3, 4, 5, 6}_1.pdf › publication files/graphing outputs/cyclo - addition S2B2_S2B2_genera{1, 2, 3, 4, 5, 6}_1.pdf]
