# Supplementary material for: The Polytope Formalism: application to molecular constitution and the prospect of a complete description of Chemical Space
Source: Royal Society of Chemistry journal article supplement (doi:10.1039/d5sc08813e), 2026-01-01

Class: S2B2 with site symmetry point group D2h  
 Genera included = {1, 2, 3, 4, 5, 6}  
 1<sup>st</sup> and 2<sup>nd</sup> order motions graph:  
 Graph vertex layout: SpringElectricalEmbedding  
 Hamiltonian graph? True  
 Eulerian graph? True  
 Planar graph? False  
 Graph radius = 2.  
 Graph diameter = 2.  
 Graph density = 0.571429

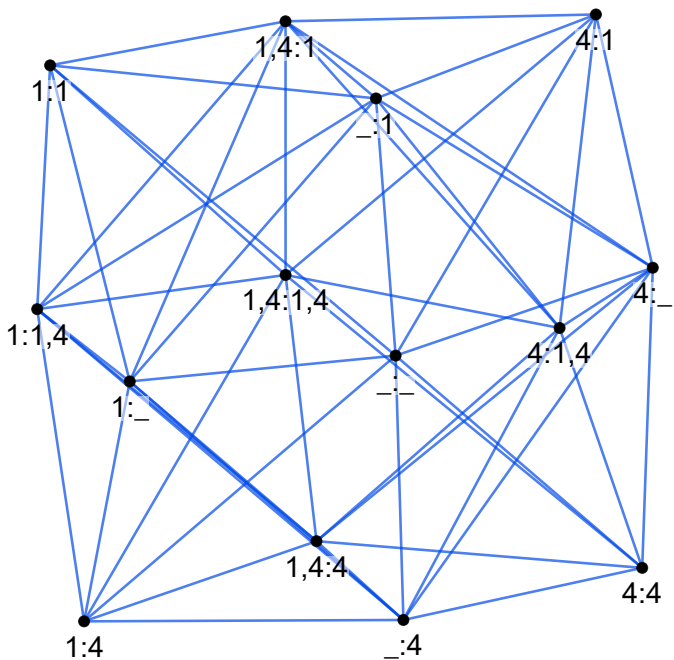

Supplement: d5sc08813e1.zip [file cyclo - addition S2B2_S2B2_genera{1, 2, 3, 4, 5, 6}_1_2.pdf › publication files/graphing outputs/cyclo - addition S2B2_S2B2_genera{1, 2, 3, 4, 5, 6}_1_2.pdf]
