# Supplementary material for: The Polytope Formalism: application to molecular constitution and the prospect of a complete description of Chemical Space
Source: Royal Society of Chemistry journal article supplement (doi:10.1039/d5sc08813e), 2026-01-01
Supplement: d5sc08813e1.zip [file S2B2 motions order table.pdf › publication files/motions order outputs/S2B2 motions order table.pdf]

|             | 0:0 | 1:1 | 0:1 | 1:0 | 0:0,1,2 | 0,1,2:0 | 1:0,1,2 | 0,1,2:1 | 0,1,2:0,1,2 |
|-------------|-----|-----|-----|-----|---------|---------|---------|---------|-------------|
| 0:0         | 0   | -   | -   | -   | 2       | 2       | -       | -       | 4           |
| 1:1         | -   | 0   | -   | -   | -       | -       | 2       | 2       | 4           |
| 0:1         | -   | -   | 0   | -   | 2       | -       | -       | 2       | 4           |
| 1:0         | -   | -   | -   | 0   | -       | 2       | 2       | -       | 4           |
| 0:0,1,2     | 2   | -   | 2   | -   | 0       | 4       | -       | 4       | 2           |
| 0,1,2:0     | 2   | -   | -   | 2   | 4       | 0       | 4       | -       | 2           |
| 1:0,1,2     | -   | 2   | -   | 2   | -       | 4       | 0       | 4       | 2           |
| 0,1,2:1     | -   | 2   | 2   | -   | 4       | -       | 4       | 0       | 2           |
| 0,1,2:0,1,2 | 4   | 4   | 4   | 4   | 2       | 2       | 2       | 2       | 0           |
