# Supplementary material for: The Polytope Formalism: application to molecular constitution and the prospect of a complete description of Chemical Space
Source: Royal Society of Chemistry journal article supplement (doi:10.1039/d5sc08813e), 2026-01-01
Supplement: d5sc08813e1.zip [file S2B3 motions order table.pdf › publication files/motions order outputs/S2B3 motions order table.pdf]

|                   | 0:0:0 | 1:1:1 | 0:0:1 | 0:1:0 | 1:0:0 | 1:1:0 | 1:0:1 | 0:1:1 | 0:0:0,1,2 | 0:0,1,2:0 | 0,1,2:0:0 | 1:1:0,1,2 | 1:0,1,2:1 | 0,1,2:1:1 | 0:1:0,1,2 | 0:0,1,2:1 | 1:0:0,1,2 | 1:0,1,2:0 | 0,1,2:0:1 | 0,1,2:1:0 | 0:0,1,2:0,1,2 | 0,1,2:0:0,1,2 | 0,1,2:0,1,2:0 | 1:0,1,2:0,1,2 | 0,1,2:1:0,1,2 | 0,1,2:0,1,2:1 | 0,1,2:0,1,2:0,1,2 |
|-------------------|-------|-------|-------|-------|-------|-------|-------|-------|-----------|-----------|-----------|-----------|-----------|-----------|-----------|-----------|-----------|-----------|-----------|-----------|---------------|---------------|---------------|---------------|---------------|---------------|-------------------|
| 0:0:0             | 0     | -     | -     | -     | -     | -     | -     | -     | 2         | 2         | 2         | -         | -         | -         | -         | -         | -         | -         | -         | -         | 4             | 4             | 4             | -             | -             | -             | 6                 |
| 1:1:1             | -     | 0     | -     | -     | -     | -     | -     | -     | -         | -         | -         | 2         | 2         | 2         | -         | -         | -         | -         | -         | -         | -             | -             | -             | 4             | 4             | 4             | 6                 |
| 0:0:1             | -     | -     | 0     | -     | -     | -     | -     | -     | 2         | -         | -         | -         | -         | -         | -         | 2         | -         | -         | 2         | -         | 4             | 4             | -             | -             | -             | 4             | 6                 |
| 0:1:0             | -     | -     | -     | 0     | -     | -     | -     | -     | -         | 2         | -         | -         | -         | -         | 2         | -         | -         | -         | 2         | -         | 4             | -             | 4             | -             | 4             | -             | 6                 |
| 1:0:0             | -     | -     | -     | -     | 0     | -     | -     | -     | -         | -         | 2         | -         | -         | -         | -         | 2         | 2         | -         | -         | -         | -             | 4             | 4             | 4             | -             | -             | 6                 |
| 1:1:0             | -     | -     | -     | -     | -     | 0     | -     | -     | -         | -         | -         | 2         | -         | -         | -         | -         | 2         | -         | -         | 2         | -             | -             | 4             | 4             | 4             | -             | 6                 |
| 1:0:1             | -     | -     | -     | -     | -     | -     | 0     | -     | -         | -         | -         | -         | 2         | -         | -         | -         | 2         | -         | 2         | -         | -             | -             | 4             | 4             | 4             | -             | 6                 |
| 0:1:1             | -     | -     | -     | -     | -     | -     | -     | 0     | -         | -         | -         | -         | -         | 2         | 2         | 2         | -         | -         | -         | -         | 4             | -             | -             | -             | 4             | 4             | 6                 |
| 0:0:0,1,2         | 2     | -     | 2     | -     | -     | -     | -     | -     | 0         | 4         | 4         | -         | -         | -         | -         | 4         | -         | -         | 4         | -         | 2             | 2             | 6             | -             | -             | 6             | 4                 |
| 0:0,1,2:0         | 2     | -     | -     | 2     | -     | -     | -     | -     | 4         | 0         | 4         | -         | -         | -         | 4         | -         | -         | -         | 4         | -         | 2             | 6             | 2             | -             | 6             | -             | 4                 |
| 0,1,2:0:0         | 2     | -     | -     | -     | 2     | -     | -     | -     | 4         | 4         | 0         | -         | -         | -         | -         | -         | 4         | 4         | -         | -         | 6             | 2             | 2             | 6             | -             | -             | 4                 |
| 1:1:0,1,2         | -     | 2     | -     | -     | -     | 2     | -     | -     | -         | -         | -         | 0         | 4         | 4         | -         | -         | -         | 4         | -         | 4         | -             | -             | 6             | 2             | 2             | 6             | 4                 |
| 1:0,1,2:1         | -     | 2     | -     | -     | -     | -     | 2     | -     | -         | -         | -         | 4         | 0         | 4         | -         | -         | 4         | -         | 4         | -         | -             | 6             | -             | 2             | 6             | 2             | 4                 |
| 0,1,2:1:1         | -     | 2     | -     | -     | -     | -     | -     | 2     | -         | -         | -         | 4         | 4         | 0         | 4         | 4         | -         | -         | -         | -         | 6             | -             | -             | 6             | 2             | 2             | 4                 |
| 0:1:0,1,2         | -     | -     | -     | 2     | -     | -     | -     | 2     | -         | 4         | -         | -         | -         | 4         | 0         | 4         | -         | -         | 4         | -         | 2             | -             | 6             | -             | 2             | 6             | 4                 |
| 0:0,1,2:1         | -     | -     | 2     | -     | -     | -     | -     | 2     | 4         | -         | -         | -         | -         | 4         | 4         | 0         | -         | -         | 4         | -         | 2             | 6             | -             | -             | 6             | 2             | 4                 |
| 1:0:0,1,2         | -     | -     | -     | -     | 2     | -     | 2     | -     | -         | -         | 4         | -         | 4         | -         | -         | -         | 0         | 4         | 4         | -         | -             | 2             | 6             | 2             | -             | 6             | 4                 |
| 1:0,1,2:0         | -     | -     | -     | -     | 2     | 2     | -     | -     | -         | -         | 4         | 4         | -         | -         | -         | -         | 4         | 0         | -         | 4         | -             | 6             | 2             | 2             | 6             | -             | 4                 |
| 0,1,2:0:1         | -     | -     | 2     | -     | -     | -     | 2     | -     | 4         | -         | -         | -         | 4         | -         | -         | 4         | 4         | -         | 0         | -         | 6             | 2             | -             | 6             | -             | 2             | 4                 |
| 0,1,2:1:0         | -     | -     | -     | 2     | -     | 2     | -     | -     | -         | 4         | -         | 4         | -         | -         | 4         | -         | -         | 4         | -         | 0         | 6             | -             | 2             | 6             | 2             | -             | 4                 |
| 0:0,1,2:0,1,2     | 4     | -     | 4     | 4     | -     | -     | -     | 4     | 2         | 2         | 6         | -         | -         | 6         | 2         | 2         | -         | -         | 6         | 6         | 0             | 4             | 4             | -             | 4             | 4             | 2                 |
| 0,1,2:0:0,1,2     | 4     | -     | 4     | -     | 4     | -     | 4     | -     | 2         | 6         | 2         | -         | 6         | -         | -         | 6         | 2         | 6         | 2         | -         | 4             | 0             | 4             | 4             | -             | 4             | 2                 |
| 0,1,2:0,1,2:0     | 4     | -     | -     | 4     | 4     | 4     | -     | -     | 6         | 2         | 2         | 6         | -         | -         | 6         | -         | 6         | 2         | -         | 2         | 4             | 4             | 0             | 4             | 4             | -             | 2                 |
| 1:0,1,2:0,1,2     | -     | 4     | -     | -     | 4     | 4     | 4     | -     | -         | -         | 6         | 2         | 2         | 6         | -         | -         | 2         | 2         | 6         | 6         | -             | 4             | 4             | 0             | 4             | 4             | 2                 |
| 0,1,2:1:0,1,2     | -     | 4     | -     | 4     | -     | 4     | -     | 4     | -         | 6         | -         | 2         | 6         | 2         | 2         | 6         | -         | 6         | -         | 2         | 4             | -             | 4             | 4             | 0             | 4             | 2                 |
| 0,1,2:0,1,2:1     | -     | 4     | 4     | -     | -     | -     | 4     | 4     | 6         | -         | -         | 6         | 2         | 2         | 6         | 2         | 6         | -         | 2         | -         | 4             | 4             | -             | 4             | 4             | 0             | 2                 |
| 0,1,2:0,1,2:0,1,2 | 6     | 6     | 6     | 6     | 6     | 6     | 6     | 6     | 4         | 4         | 4         | 4         | 4         | 4         | 4         | 4         | 4         | 4         | 4         | 4         | 2             | 2             | 2             | 2             | 2             | 2             | 0                 |
