# Supplementary material for: The Polytope Formalism: application to molecular constitution and the prospect of a complete description of Chemical Space
Source: Royal Society of Chemistry journal article supplement (doi:10.1039/d5sc08813e), 2026-01-01
Supplement: d5sc08813e1.zip [file S3B1 motions order table.pdf › publication files/species/S3B1 motions order table.pdf]

|                 | $\emptyset$ | 1           | 2           | 1,2         | $\emptyset,2$ | $\emptyset,1$ | $\emptyset,1,2$ |
|-----------------|-------------|-------------|-------------|-------------|---------------|---------------|-----------------|
| $\emptyset$     | $\emptyset$ | –           | –           | –           | 1             | 1             | 2               |
| 1               | –           | $\emptyset$ | –           | 1           | –             | 1             | 2               |
| 2               | –           | –           | $\emptyset$ | 1           | 1             | –             | 2               |
| 1,2             | –           | 1           | 1           | $\emptyset$ | –             | –             | 1               |
| $\emptyset,2$   | 1           | –           | 1           | –           | $\emptyset$   | –             | 1               |
| $\emptyset,1$   | 1           | 1           | –           | –           | –             | $\emptyset$   | 1               |
| $\emptyset,1,2$ | 2           | 2           | 2           | 1           | 1             | 1             | $\emptyset$     |
