# Supplementary material for: The Polytope Formalism: application to molecular constitution and the prospect of a complete description of Chemical Space
Source: Royal Society of Chemistry journal article supplement (doi:10.1039/d5sc08813e), 2026-01-01
Supplement: d5sc08813e1.zip [file S3B2 motions order table.pdf › publication files/motions order outputs/S3B2 motions order table.pdf]

|           | 0:0 | 1:1 | 2:2 | 0:1 | 1:0 | 1:2 | 2:1 | 2:0 | 0:2 | 0:1,2 | 1,2:0 | 1:0,2 | 0,2:1 | 2:0,1 | 0,1:2 | 0:0,2 | 0,2:0 | 1:0,1 | 0,1:1 | 2:1,2 | 1,2:2 | 0:0,1 | 0,1:0 | 1:1,2 | 1,2:1 | 2:0,2 | 0,2:2 | 1,2:1,2 | 0,2:0,2 | 0,1:0,1 | 1,2:0,2 | 0,2:1,2 | 0,2:0,1 | 0,1:0,2 | 0,1:1,2 | 1,2:0,1 | 0:0,1,2 | 0,1,2:0 | 1:0,1,2 | 0,1,2:1 | 2:0,1,2 | 0,1,2:2 | 1,2:0,1,2 | 0,1,2:1,2 | 0,2:0,1,2 | 0,1,2:0,2 | 0,1:0,1,2 | 0,1,2:0,1 | 0,1,2:0,1,2 |   |   |
|-----------|-----|-----|-----|-----|-----|-----|-----|-----|-----|-------|-------|-------|-------|-------|-------|-------|-------|-------|-------|-------|-------|-------|-------|-------|-------|-------|-------|---------|---------|---------|---------|---------|---------|---------|---------|---------|---------|---------|---------|---------|---------|---------|-----------|-----------|-----------|-----------|-----------|-----------|-------------|---|---|
| 0:0       | 0   | -   | -   | -   | -   | -   | -   | -   | -   | -     | -     | -     | -     | -     | 1     | 1     | -     | -     | -     | -     | -     | 1     | 1     | -     | -     | -     | -     | -       | 2       | 2       | -       | -       | 2       | 2       | -       | -       | 2       | 2       | -       | -       | -       | -       | -         | -         | 3         | 3         | -         | 3         | 3           | 4 |   |
| 1:1       | -   | 0   | -   | -   | -   | -   | -   | -   | -   | -     | -     | -     | -     | -     | 1     | 1     | -     | 1     | 1     | -     | -     | -     | 1     | 1     | -     | -     | -     | -       | -       | 2       | 2       | 2       | -       | -       | -       | 2       | 2       | -       | 2       | 2       | -       | 3       | 3         | -         | -         | -         | 3         | 4         |             |   |   |
| 2:2       | -   | -   | 0   | -   | -   | -   | -   | -   | -   | -     | -     | -     | -     | -     | -     | -     | -     | -     | -     | 1     | 1     | -     | -     | -     | 1     | 1     | 1     | 1       | 2       | 2       | 2       | 2       | -       | -       | -       | -       | -       | -       | 2       | 2       | -       | 3       | 3         | -         | -         | -         | 4         |           |             |   |   |
| 0:1       | -   | -   | -   | 0   | -   | -   | -   | -   | -   | 1     | -     | -     | 1     | -     | -     | -     | -     | -     | -     | -     | -     | 1     | -     | -     | -     | -     | -     | -       | -       | 2       | -       | -       | 2       | -       | 2       | -       | 2       | -       | -       | -       | 3       | 3       | -         | -         | -         | 3         | 4         |           |             |   |   |
| 1:0       | -   | -   | -   | -   | 0   | -   | -   | -   | -   | -     | 1     | 1     | -     | -     | -     | -     | -     | 1     | -     | -     | -     | -     | 1     | -     | -     | -     | -     | -       | -       | -       | 2       | 2       | -       | 2       | -       | 2       | -       | 2       | -       | 3       | 3       | -       | -         | -         | 3         | 4         |           |           |             |   |   |
| 1:2       | -   | -   | -   | -   | -   | 0   | -   | -   | -   | -     | 1     | -     | -     | 1     | -     | -     | -     | -     | -     | 1     | -     | -     | -     | 1     | -     | -     | -     | -       | 2       | -       | -       | 2       | -       | 2       | -       | 2       | -       | 2       | -       | 3       | 3       | -       | -         | -         | 3         | 4         |           |           |             |   |   |
| 2:1       | -   | -   | -   | -   | -   | -   | 0   | -   | -   | -     | -     | -     | 1     | 1     | -     | -     | -     | -     | -     | -     | 1     | -     | -     | -     | 1     | -     | -     | -       | -       | -       | -       | 2       | -       | 2       | -       | 2       | -       | 2       | -       | 3       | 3       | -       | -         | -         | 3         | 4         |           |           |             |   |   |
| 2:0       | -   | -   | -   | -   | -   | -   | -   | 0   | -   | -     | 1     | -     | -     | 1     | -     | -     | 1     | -     | -     | 1     | -     | -     | -     | -     | -     | 1     | -     | -       | 2       | -       | -       | 2       | -       | 2       | -       | 2       | -       | 2       | -       | 3       | 3       | -       | -         | -         | 3         | 4         |           |           |             |   |   |
| 0:2       | -   | -   | -   | -   | -   | -   | -   | -   | 0   | 1     | -     | -     | -     | 1     | -     | -     | -     | -     | -     | 2     | -     | -     | -     | -     | -     | -     | -     | -       | -       | 2       | -       | -       | -       | 2       | -       | 2       | -       | -       | -       | 3       | 3       | -       | -         | -         | 3         | 4         |           |           |             |   |   |
| 0:1,2     | -   | -   | -   | 1   | -   | -   | -   | -   | -   | 1     | 0     | -     | 2     | -     | 2     | -     | -     | -     | 2     | -     | -     | -     | -     | -     | -     | -     | -     | 2       | -       | -       | -       | -       | -       | 1       | -       | -       | 1       | -       | -       | 3       | -       | 2       | 2         | -         | -         | -         | 3         | 4         |             |   |   |
| 1,2:0     | -   | -   | -   | -   | 1   | -   | -   | 1   | 1   | 0     | -     | 0     | 2     | -     | 2     | -     | 2     | -     | -     | -     | -     | -     | -     | -     | -     | -     | 2     | -       | -       | -       | -       | -       | -       | -       | 1       | -       | 1       | 3       | -       | 3       | -       | 2       | 2         | -         | -         | -         | 2         | 3         |             |   |   |
| 1:0,2     | -   | -   | -   | -   | 1   | 1   | -   | -   | 2   | 0     | -     | 0     | -     | 2     | -     | -     | -     | -     | -     | 2     | -     | -     | 2     | -     | -     | -     | -     | -       | -       | -       | -       | -       | -       | 1       | -       | 1       | 3       | -       | 3       | 1       | -       | 3       | -         | 2         | 2         | -         | -         | -         | 3           |   |   |
| 0,2:1     | -   | -   | -   | 1   | -   | -   | 1   | -   | -   | 2     | -     | 0     | -     | 2     | -     | -     | -     | -     | -     | -     | 2     | -     | -     | -     | -     | -     | -     | -       | -       | -       | -       | -       | -       | -       | 1       | 1       | -       | 3       | 1       | -       | 3       | -       | 2         | 2         | -         | -         | -         | 3         |             |   |   |
| 2:0,1     | -   | -   | -   | -   | -   | 1   | -   | 1   | 2   | -     | 2     | -     | 2     | 0     | -     | 2     | -     | -     | -     | -     | -     | -     | -     | 2     | -     | -     | -     | -       | -       | -       | -       | -       | -       | -       | 1       | 1       | -       | 3       | -       | 3       | 1       | -       | 2         | 2         | -         | -         | -         | 3         |             |   |   |
| 0,1:2     | -   | -   | -   | -   | -   | 1   | -   | -   | 1   | 2     | -     | 2     | -     | 0     | 2     | -     | 2     | -     | -     | -     | -     | -     | -     | 2     | -     | -     | -     | -       | -       | -       | -       | -       | -       | -       | 1       | 1       | -       | 3       | -       | 3       | 1       | -       | 1         | -         | 2         | 2         | -         | -         | -           | 3 |   |
| 0:0,2     | 1   | -   | -   | -   | -   | -   | -   | -   | 1   | -     | -     | -     | -     | -     | 2     | 0     | 2     | -     | -     | -     | -     | -     | 2     | -     | -     | -     | 2     | -       | 1       | -       | -       | -       | -       | 1       | -       | 1       | 3       | -       | -       | -       | 3       | -       | 2         | 2         | -         | -         | -         | 3         |             |   |   |
| 0,2:0     | 1   | -   | -   | -   | -   | -   | -   | 1   | -   | -     | -     | -     | -     | 2     | 0     | -     | -     | -     | -     | -     | -     | -     | -     | -     | -     | -     | 2     | -       | 1       | -       | -       | -       | -       | -       | 1       | 3       | -       | -       | -       | 3       | 1       | -       | 3         | -         | 2         | 2         | -         | -         | -           | 3 |   |
| 1:0,1     | -   | 1   | -   | -   | 1   | -   | -   | -   | -   | -     | 2     | -     | -     | -     | -     | 0     | 2     | -     | 0     | 2     | -     | -     | -     | -     | -     | -     | -     | -       | -       | -       | -       | -       | -       | -       | -       | -       | 1       | 3       | -       | 3       | 1       | -       | -         | 2         | 2         | -         | -         | -         | 3           |   |   |
| 0,1:1     | -   | 1   | -   | 1   | -   | -   | -   | -   | -   | 2     | -     | -     | -     | -     | 0     | -     | -     | -     | 2     | 0     | -     | -     | -     | -     | -     | -     | -     | -       | -       | -       | -       | -       | -       | -       | -       | -       | -       | 1       | 3       | -       | 3       | 1       | -         | -         | 2         | 2         | -         | -         | -           | 3 |   |
| 2:1,2     | -   | -   | 1   | -   | -   | -   | 1   | -   | -   | -     | -     | -     | 2     | -     | -     | -     | -     | -     | -     | 0     | 2     | -     | -     | -     | 2     | -     | -     | 2       | 1       | -       | -       | -       | -       | -       | -       | -       | 3       | -       | 3       | 1       | -       | 2       | 2         | -         | -         | -         | -         | 3         |             |   |   |
| 1,2:2     | -   | -   | 1   | -   | -   | 1   | -   | -   | -   | -     | -     | 2     | -     | -     | -     | -     | -     | -     | -     | 0     | 2     | -     | -     | -     | 2     | -     | -     | 2       | 1       | -       | -       | -       | -       | -       | -       | -       | -       | -       | 3       | -       | 3       | 1       | -         | 2         | 2         | -         | -         | -         | 3           |   |   |
| 0:0,1     | 1   | -   | -   | 1   | -   | -   | -   | -   | -   | -     | -     | -     | 2     | -     | -     | 2     | -     | 2     | -     | -     | 2     | -     | -     | -     | -     | -     | -     | -       | -       | -       | -       | -       | -       | -       | 1       | -       | -       | -       | -       | 3       | -       | 3       | 1         | -         | -         | -         | 3         |           |             |   |   |
| 0,1:0     | 1   | -   | -   | -   | 1   | -   | -   | -   | -   | -     | 2     | -     | -     | -     | 2     | -     | 2     | -     | 2     | 0     | -     | -     | -     | -     | -     | -     | -     | -       | -       | -       | -       | -       | -       | -       | -       | 1       | 3       | -       | 3       | 1       | -       | -       | -         | 2         | 2         | -         | -         | -         | 3           |   |   |
| 1:1,2     | -   | 1   | -   | -   | -   | 1   | -   | -   | -   | -     | -     | -     | -     | 2     | -     | -     | -     | 2     | -     | -     | 2     | -     | -     | -     | -     | -     | -     | -       | -       | -       | -       | -       | -       | -       | -       | -       | -       | 1       | 3       | -       | 3       | 1       | -         | -         | 2         | 2         | -         | -         | -           | 3 |   |
| 1,2:1     | -   | 1   | -   | -   | -   | 1   | -   | -   | -   | -     | -     | -     | -     | 2     | -     | -     | -     | 2     | -     | -     | 2     | -     | -     | -     | -     | -     | -     | -       | -       | -       | -       | -       | -       | -       | -       | -       | -       | -       | 1       | 3       | -       | 3       | 1         | -         | -         | 2         | 2         | -         | -           | - | 3 |
| 2:0,2     | -   | -   | 1   | -   | -   | -   | -   | 1   | -   | -     | 2     | -     | -     | -     | -     | -     | 2     | -     | -     | -     | -     | -     | -     | -     | -     | -     | -     | -       | -       | -       | -       | -       | -       | -       | -       | -       | -       | -       | -       | 3       | -       | 3       | 1         | -         | 3         | 2         | -         | -         | -           | 3 |   |
| 0,2:2     | -   | -   | 1   | -   | -   | -   | -   | -   | 1   | 2     | -     | -     | -     | -     | -     | -     | -     | -     | -     | -     | 2     | -     | -     | -     | -     | -     | -     | -       | -       | -       | -       | -       | -       | -       | -       | -       | -       | -       | -       | -       | -       | 3       | -         | 3         | 1         | -         | -         | -         | 3           |   |   |
| 1,2:1,2   | -   | 2   | 2   | -   | -   | 2   | 2   | -   | -   | -     | -     | -     | -     | -     | -     | -     | -     | -     | -     | 1     | 1     | -     | -     | -     | -     | -     | -     | -       | -       | -       | -       | -       | -       | -       | -       | -       | -       | -       | -       | 2       | 2       | -       | 2         | 2         | -         | -         | -         | 3         |             |   |   |
| 0,2:0,2   | 2   | -   | 2   | -   | -   | -   | -   | 2   | 2   | -     | -     | -     | -     | -     | -     | 1     | 1     | -     | -     | -     | -     | -     | -     | -     | -     | -     | -     | -       | -       | -       | -       | -       | -       | -       | -       | -       | -       | -       | -       | -       | -       | -       | -         | -         | -         | -         | -         | 2         |             |   |   |
| 0,1:0,1   | 2   | 2   | -   | 2   | 2   | -   | -   | -   | -   | -     | -     | -     | -     | -     | -     | 1     | 1     | -     | 1     | 1     | -     | -     | -     | -     | -     | -     | -     | -       | -       | -       | -       | -       | -       | -       | -       | -       | -       | -       | -       | -       | -       | -       | -         | -         | -         | -         | -         | 2         |             |   |   |
| 1,2:0,2   | -   | -   | 2   | -   | 2   | 2   | -   | 2   | -   | 1     | 1     | -     | -     | -     | -     | -     | -     | -     | -     | 1     | -     | -     | -     | -     | -     | -     | -     | -       | -       | -       | -       | -       | -       | -       | -       | -       | -       | -       | -       | -       | -       | -       | -         | -         | -         | -         | -         | 2         |             |   |   |
| 0,2:1,2   | -   | -   | 2   | 2   | -   | -   | 2   | -   | 2   | 1     | -     | -     | 1     | -     | -     | -     | -     | -     | -     | 1     | -     | -     | -     | -     | -     | -     | -     | -       | -       | -       | -       | -       | -       | -       | -       | -       | -       | -       | -       | -       | -       | -       | -         | -         | -         | -         | -         | -         | 2           |   |   |
| 0,2:0,1   | 2   | -   | -   | 2   | -   | -   | 2   | 2   | -   | -     | -     | -     | 1     | 1     | -     | -     | -     | -     | -     | -     | -     | -     | -     | -     | -     | -     | -     | -       | -       | -       | -       | -       | -       | -       | -       | -       | -       | -       | -       | -       | -       | -       | -         | -         | -         | -         | -         | 2         |             |   |   |
| 0,1:0,2   | 2   | -   | -   | -   | 2   | 2   | -   | -   | 2   | -     | -     | 1     | -     | -     | 1     | 1     | -     | -     | -     | -     | -     | -     | -     | -     | -     | -     | -     | -       | -       | -       | -       | -       | -       | -       | -       | -       | -       | -       | -       | -       | -       | -       | -         | -         | -         | -         | -         | 2         |             |   |   |
| 0,1:1,2   | -   | 2   | -   | 2   | -   | 2   | -   | -   | 2   | 1     | -     | -     | -     | -     | -     | -     | -     | -     | 1     | -     | -     | -     | -     | -     | -     | -     | -     | -       | -       | -       | -       | -       | -       | -       | -       | -       | -       | -       | -       | -       | -       | -       | -         | -         | -         | -         | -         | 2         |             |   |   |
| 1,2:0,1   | -   | 2   | -   | -   | 2   | -   | 2   | 2   | -   | 1     | -     | -     | -     | 1     | -     | -     | -     | -     | -     | -     | -     | -     | -     | -     | -     | -     | -     | -       | -       | -       | -       | -       | -       | -       | -       | -       | -       | -       | -       | -       | -       | -       | -         | -         | -         | -         | -         | 2         |             |   |   |
| 0:0,1,2   | 2   | -   | -   | 2   | -   | -   | -   | 2   | 1   | -     | -     | 3     | -     | 3     | 1     | 3     | -     | 3     | -     | -     | -     | -     | -     | -     | -     | -     | -     | -       | -       | -       | -       | -       | -       | -       | -       | -       | -       | -       | -       | -       | -       | -       | -         | -         | -         | -         | -         | -         | 2           |   |   |
| 0,1,2:0   | 2   | -   | -   | -   | 2   | -   | -   | 2   | -   | -     | 1     | 3     | -     | 3     | 1     | 3     | -     | -     | -     | -     | -     | -     | -     | -     | -     | -     | -     | -       | -       | -       | -       | -       | -       | -       | -       | -       | -       | -       | -       | -       | -       | -       | -         | -         | -         | -         | -         | -         | 2           |   |   |
| 0,1,2:0,1 | -   | 2   | -   | -   | -   | -   | 2   | -   | -   | -     | -     | -     | -     | -     | -     | -     | -     | -     | -     | -     | -     | -     | -     | -     | -     | -     | -     | -       | -       | -       | -       | -       | -       | -       | -       | -       | -       | -       | -       | -       | -       | -       | -         | -         | -         | -         | -         | -         | 2           |   |   |
| 2:0,1,2   | -   | -   | 2   | -   | -   | -   | -   | -   | 2   | 1     | 3     | -     | 3     | 1     | -     | -     | 3     | 1     | 3     | -     | -     | -     | -     | -     | -     | -     | -     | -       | -       | -       | -       | -       | -       | -       | -       | -       | -       | -       | -       | -       | -       | -       | -         | -         | -         | -         | -         | -         | 2           |   |   |
| 0,1,2:2   | -   | -   | 2   | -   | -   | 2   | -   | -   | 2   | 3     | -     | 3     | -     | 1     | 3     | -     | -     | -     | -     | 3     | 1     | -     | -     | -     | -     | -     | -     | -       | -       | -       | -       | -       | -       | -       | -       | -       | -       | -       | -       | -       | -       | -       | -         | -         | -         | -         | -         | -         | 2           |   |   |
| 1,2:0,1,2 | -   | 3   | 3   | -   | 3   | 3   | 3   | -   | -   | 2     | 2     | -     | 2     | -     | -     | -     | -     | 2     | -     | 2     | 2     | -     | -     | -     | -     | -     | -     | -       | -       | -       | -       | -       | -       | -       | -       | -       | -       | -       | -       | -       | -       | -       | -         | -         | -         | -         | -         | -         | 2           |   |   |
| 0,1,2:1,2 | -   | 3   | 3   | 3   | -   | 3   | 3   | -   | 3   | 2     | -     | -     | 2     | -     | -     | -     | -     | 2     | -     | 2     | 2     | -     | -     | -     | -     | -     | -     | -       | -       | -       | -       | -       | -       | -       | -       | -       | -       | -       | -       | -       | -       | -       | -         | -         | -         | -         | -         | -         | 2           |   |   |
| 0,2:0,1,2 | 3   | -   | 3   | 3   | -   | -   | 3   | 3   | 2   | -     | -     | -     | 2     | 2     | -     | 2     | 2     | -     | -     | 2     | -     | -     | -     | -     | -     | -     | -     | -       | -       | -       | -       | -       | -       | -       | -       | -       | -       | -       | -       | -       | -       | -       | -         | -         | -         | -         | -         | -         | 2           |   |   |
| 0,1,2:0,2 | 3   | -   | 3   | -   |     |     |     |     |     |       |       |       |       |       |       |       |       |       |       |       |       |       |       |       |       |       |       |         |         |         |         |         |         |         |         |         |         |         |         |         |         |         |           |           |           |           |           |           |             |   |   |
