# Supplementary material for: The Polytope Formalism: application to molecular constitution and the prospect of a complete description of Chemical Space
Source: Royal Society of Chemistry journal article supplement (doi:10.1039/d5sc08813e), 2026-01-01
Supplement: d5sc08813e1.zip [file S4B1 motions order table.pdf › publication files/motions order outputs/S4B1 motions order table.pdf]

|       | 0 | 1 | 2 | 3 | 0,1 | 1,2 | 2,3 | 0,3 | 0,2 | 1,3 | 1,2 | 0,2 | 0,1 | 0,1,2 | 0,1,2 |
|-------|---|---|---|---|-----|-----|-----|-----|-----|-----|-----|-----|-----|-------|-------|
| 0     | 0 | - | - | - | 1   | -   | -   | 1   | 1   | -   | -   | 1   | 1   | 2     | 2     |
| 1     | - | 0 | - | - | 1   | 1   | -   | -   | -   | 1   | 1   | -   | 1   | 2     | 2     |
| 2     | - | - | 0 | - | -   | 1   | 1   | -   | 1   | -   | 1   | 1   | -   | 2     | 2     |
| 3     | - | - | - | 0 | -   | -   | 1   | 1   | -   | 1   | -   | -   | -   | -     | -     |
| 0,1   | 1 | 1 | - | - | 0   | -   | -   | -   | -   | -   | -   | -   | 0   | 1     | 1     |
| 1,2   | - | 1 | 1 | - | -   | 0   | -   | -   | -   | -   | 0   | -   | -   | 1     | 1     |
| 2,3   | - | - | 1 | 1 | -   | -   | 0   | -   | -   | -   | -   | -   | -   | -     | -     |
| 0,3   | 1 | - | - | 1 | -   | -   | -   | 0   | -   | -   | -   | -   | -   | -     | -     |
| 0,2   | 1 | - | 1 | - | -   | -   | -   | -   | 0   | -   | -   | 0   | -   | 1     | 1     |
| 1,3   | - | 1 | - | 1 | -   | -   | -   | -   | -   | 0   | -   | -   | -   | -     | -     |
| 1,2   | - | 1 | 1 | - | -   | 0   | -   | -   | -   | -   | 0   | -   | -   | 1     | 1     |
| 0,2   | 1 | - | 1 | - | -   | -   | -   | -   | 0   | -   | -   | 0   | -   | 1     | 1     |
| 0,1   | 1 | 1 | - | - | 0   | -   | -   | -   | -   | -   | -   | -   | 0   | 1     | 1     |
| 0,1,2 | 2 | 2 | 2 | - | 1   | 1   | -   | -   | 1   | -   | 1   | 1   | 1   | 0     | 0     |
| 0,1,2 | 2 | 2 | 2 | - | 1   | 1   | -   | -   | 1   | -   | 1   | 1   | 1   | 0     | 0     |
