# Supplementary figures and images for: The Polytope Formalism: application to molecular constitution and the prospect of a complete description of Chemical Space
Source: Royal Society of Chemistry journal article supplement (doi:10.1039/d5sc08813e), 2026-01-01

0 2 4

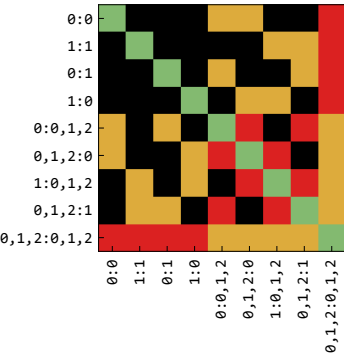

Supplement: d5sc08813e1.zip [file S2B2 motions order plot.pdf › publication files/motions order outputs/S2B2 motions order plot.pdf]

0 2 4 6

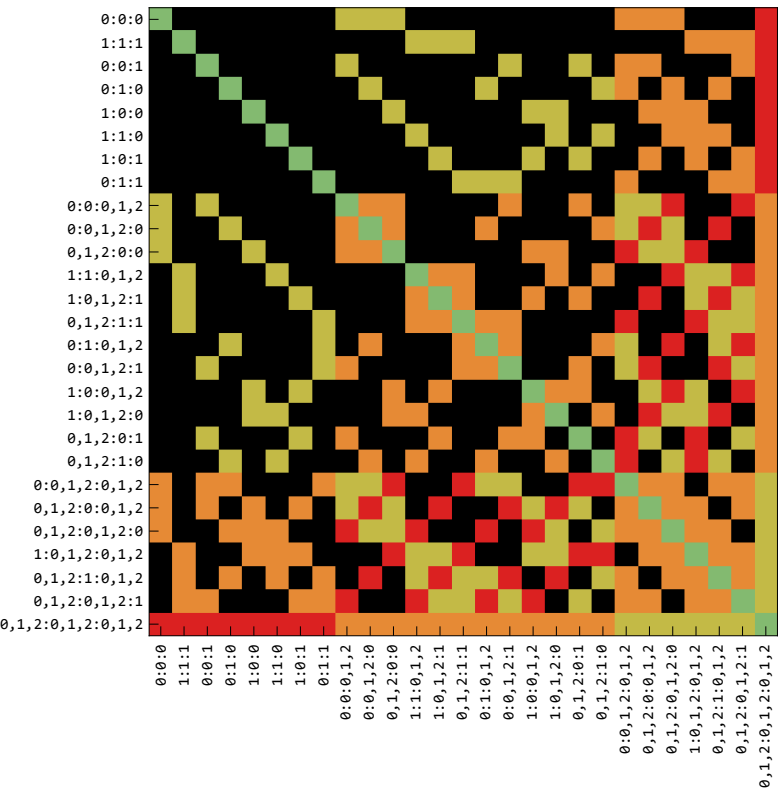

Supplement: d5sc08813e1.zip [file S2B3 motions order plot.pdf › publication files/motions order outputs/S2B3 motions order plot.pdf]

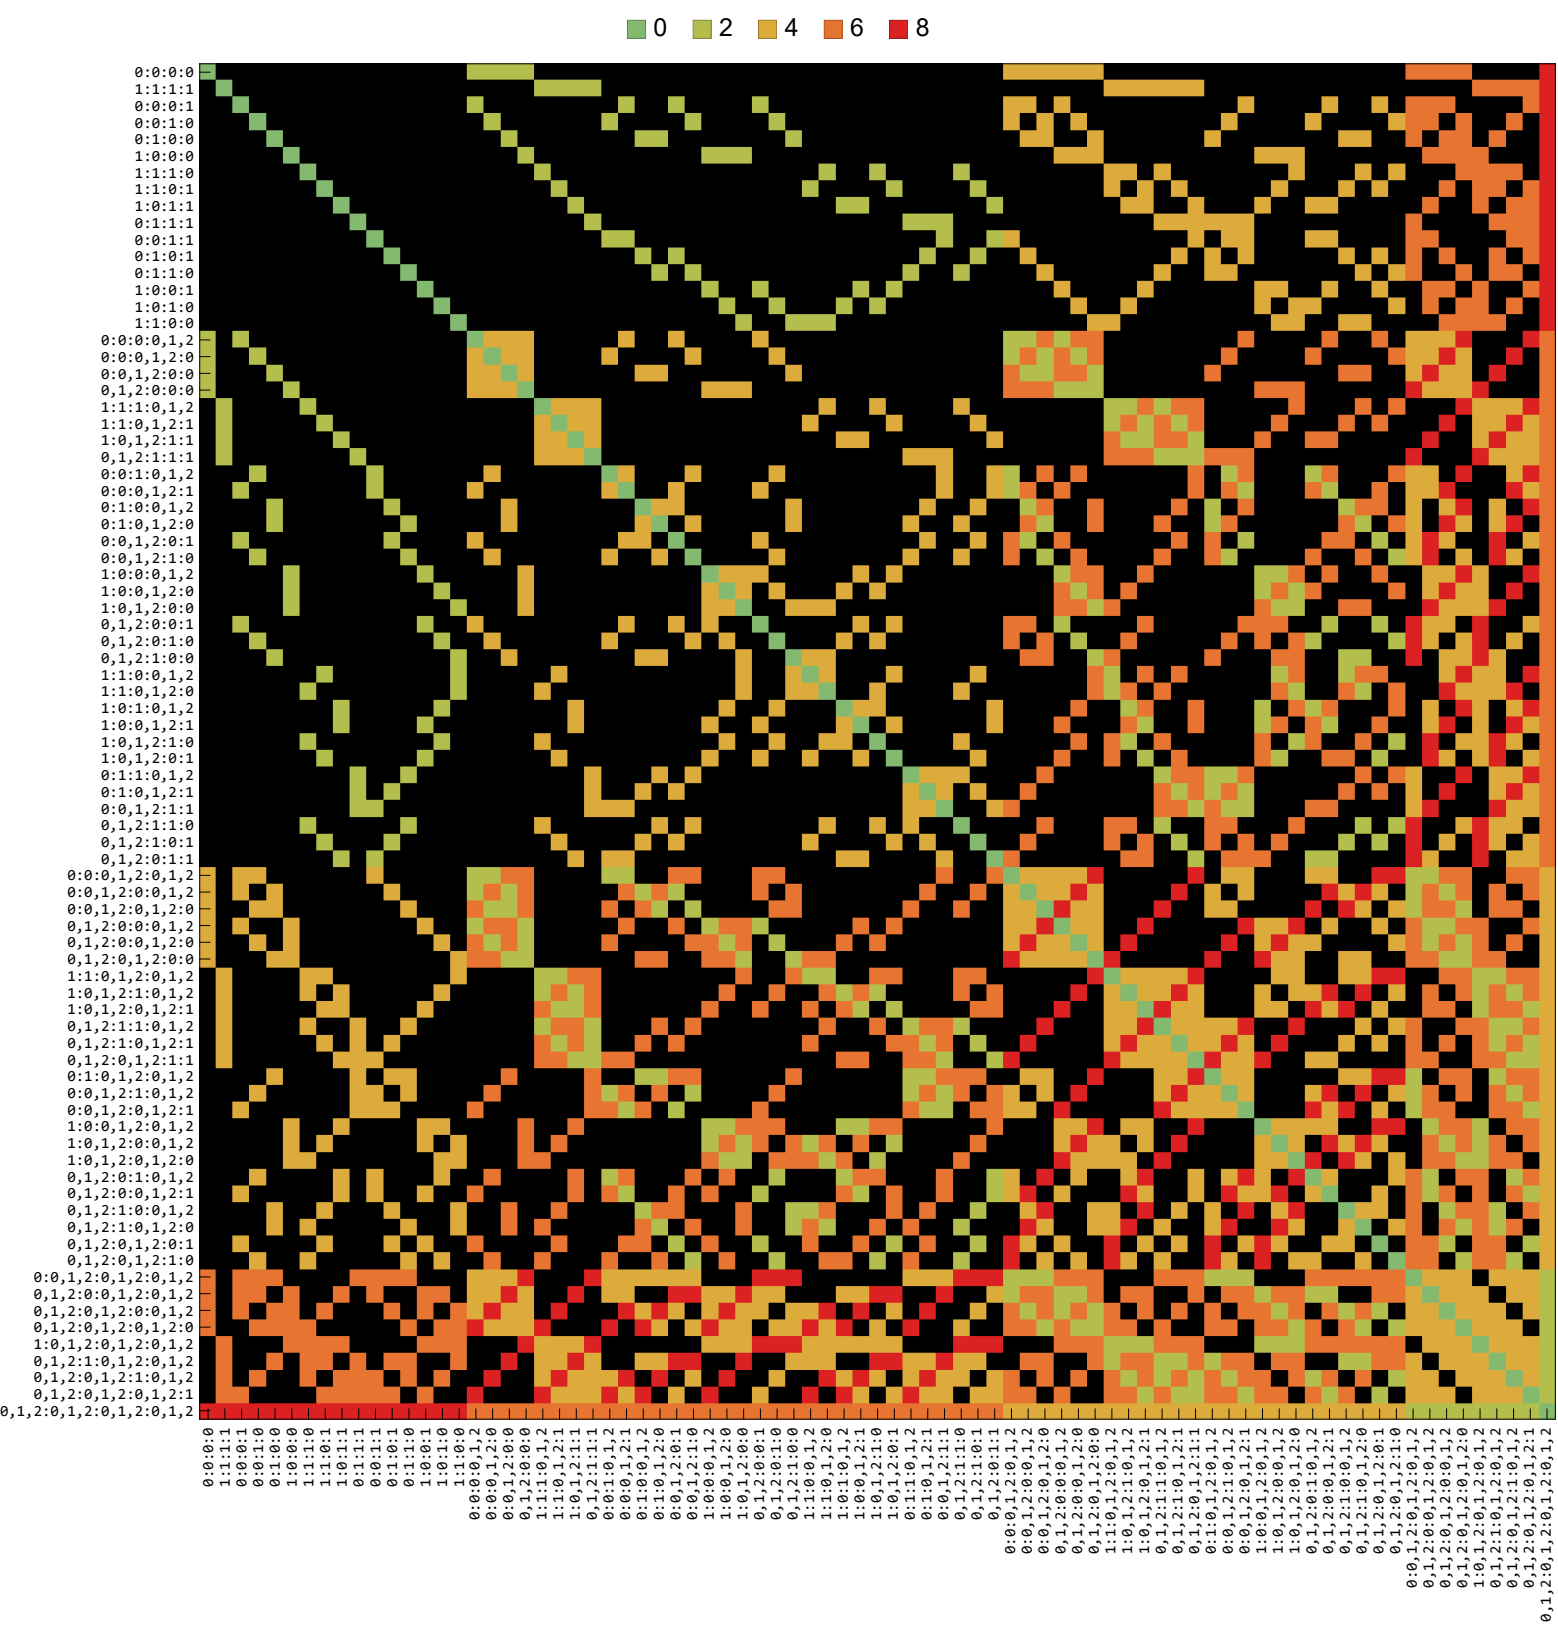

Supplement: d5sc08813e1.zip [file S2B4 motions order plot.pdf › publication files/motions order outputs/S2B4 motions order plot.pdf]

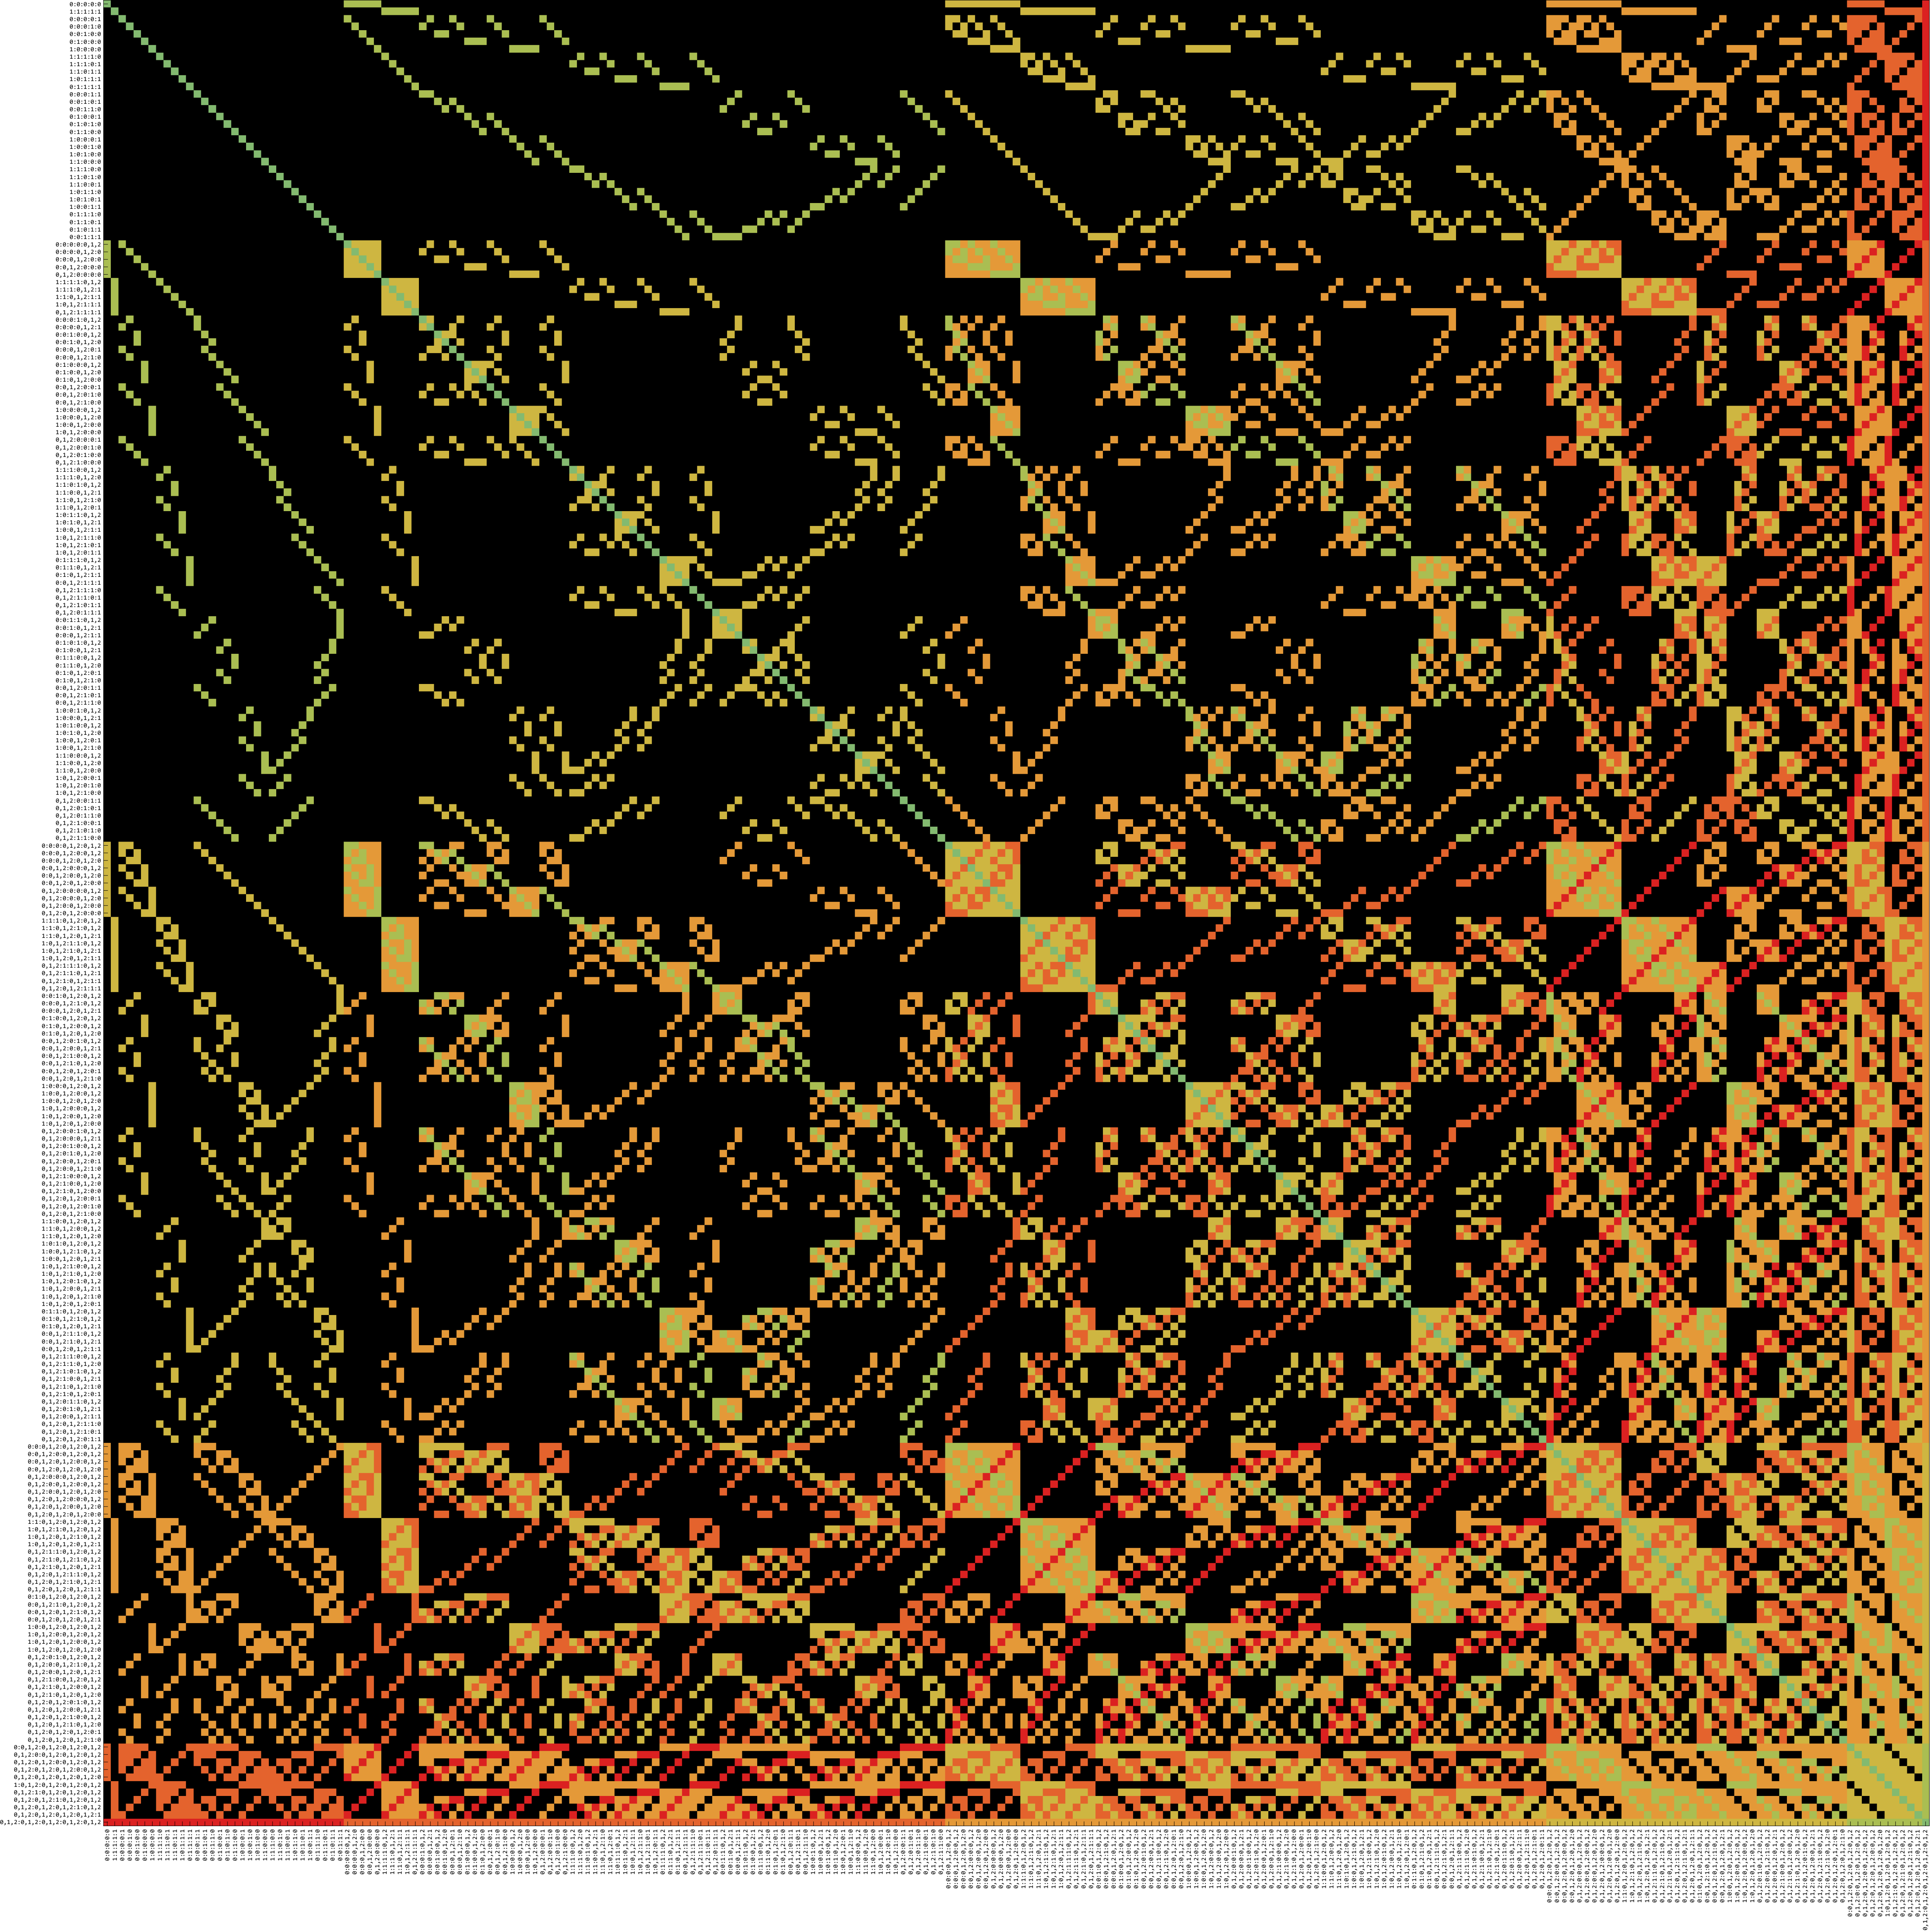

Supplement: d5sc08813e1.zip [file S2B5 motions order plot.pdf › publication files/motions order outputs/S2B5 motions order plot.pdf]

0 1 2 3 4

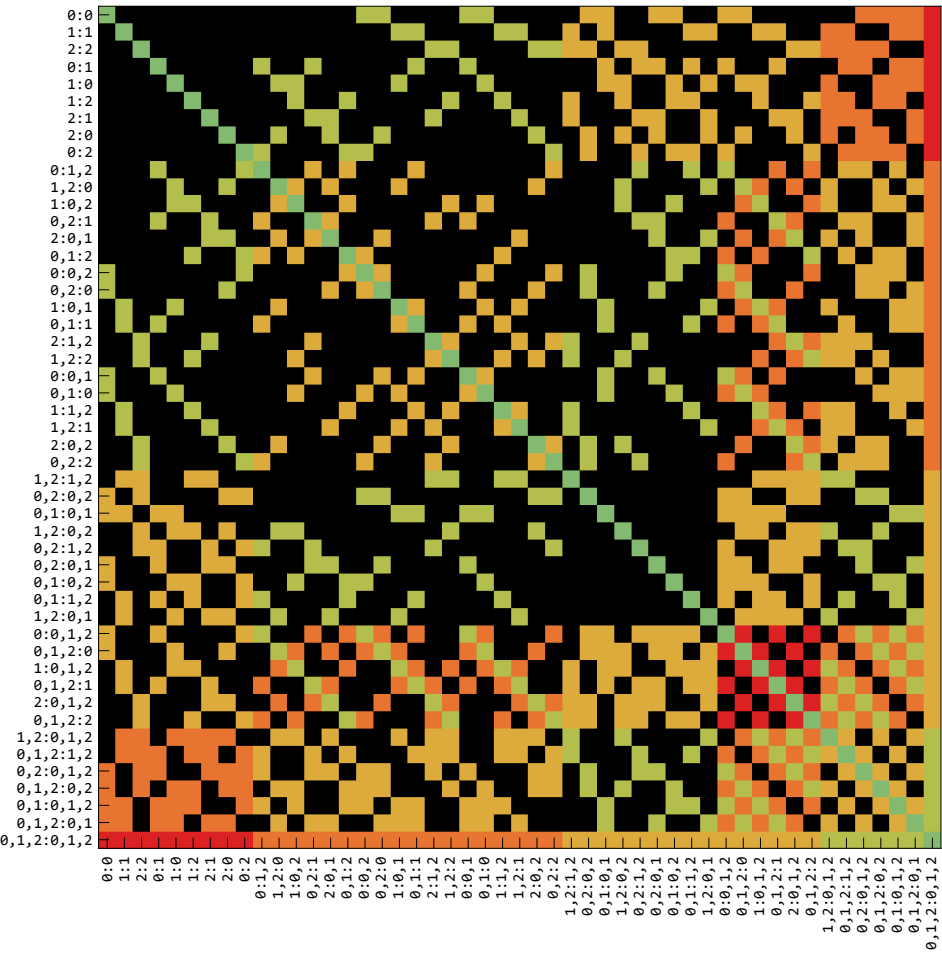

Supplement: d5sc08813e1.zip [file S3B2 motions order plot.pdf › publication files/motions order outputs/S3B2 motions order plot.pdf]

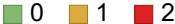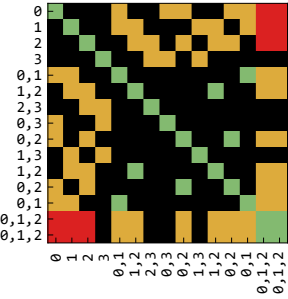

Supplement: d5sc08813e1.zip [file S4B1 motions order plot.pdf › publication files/motions order outputs/S4B1 motions order plot.pdf]

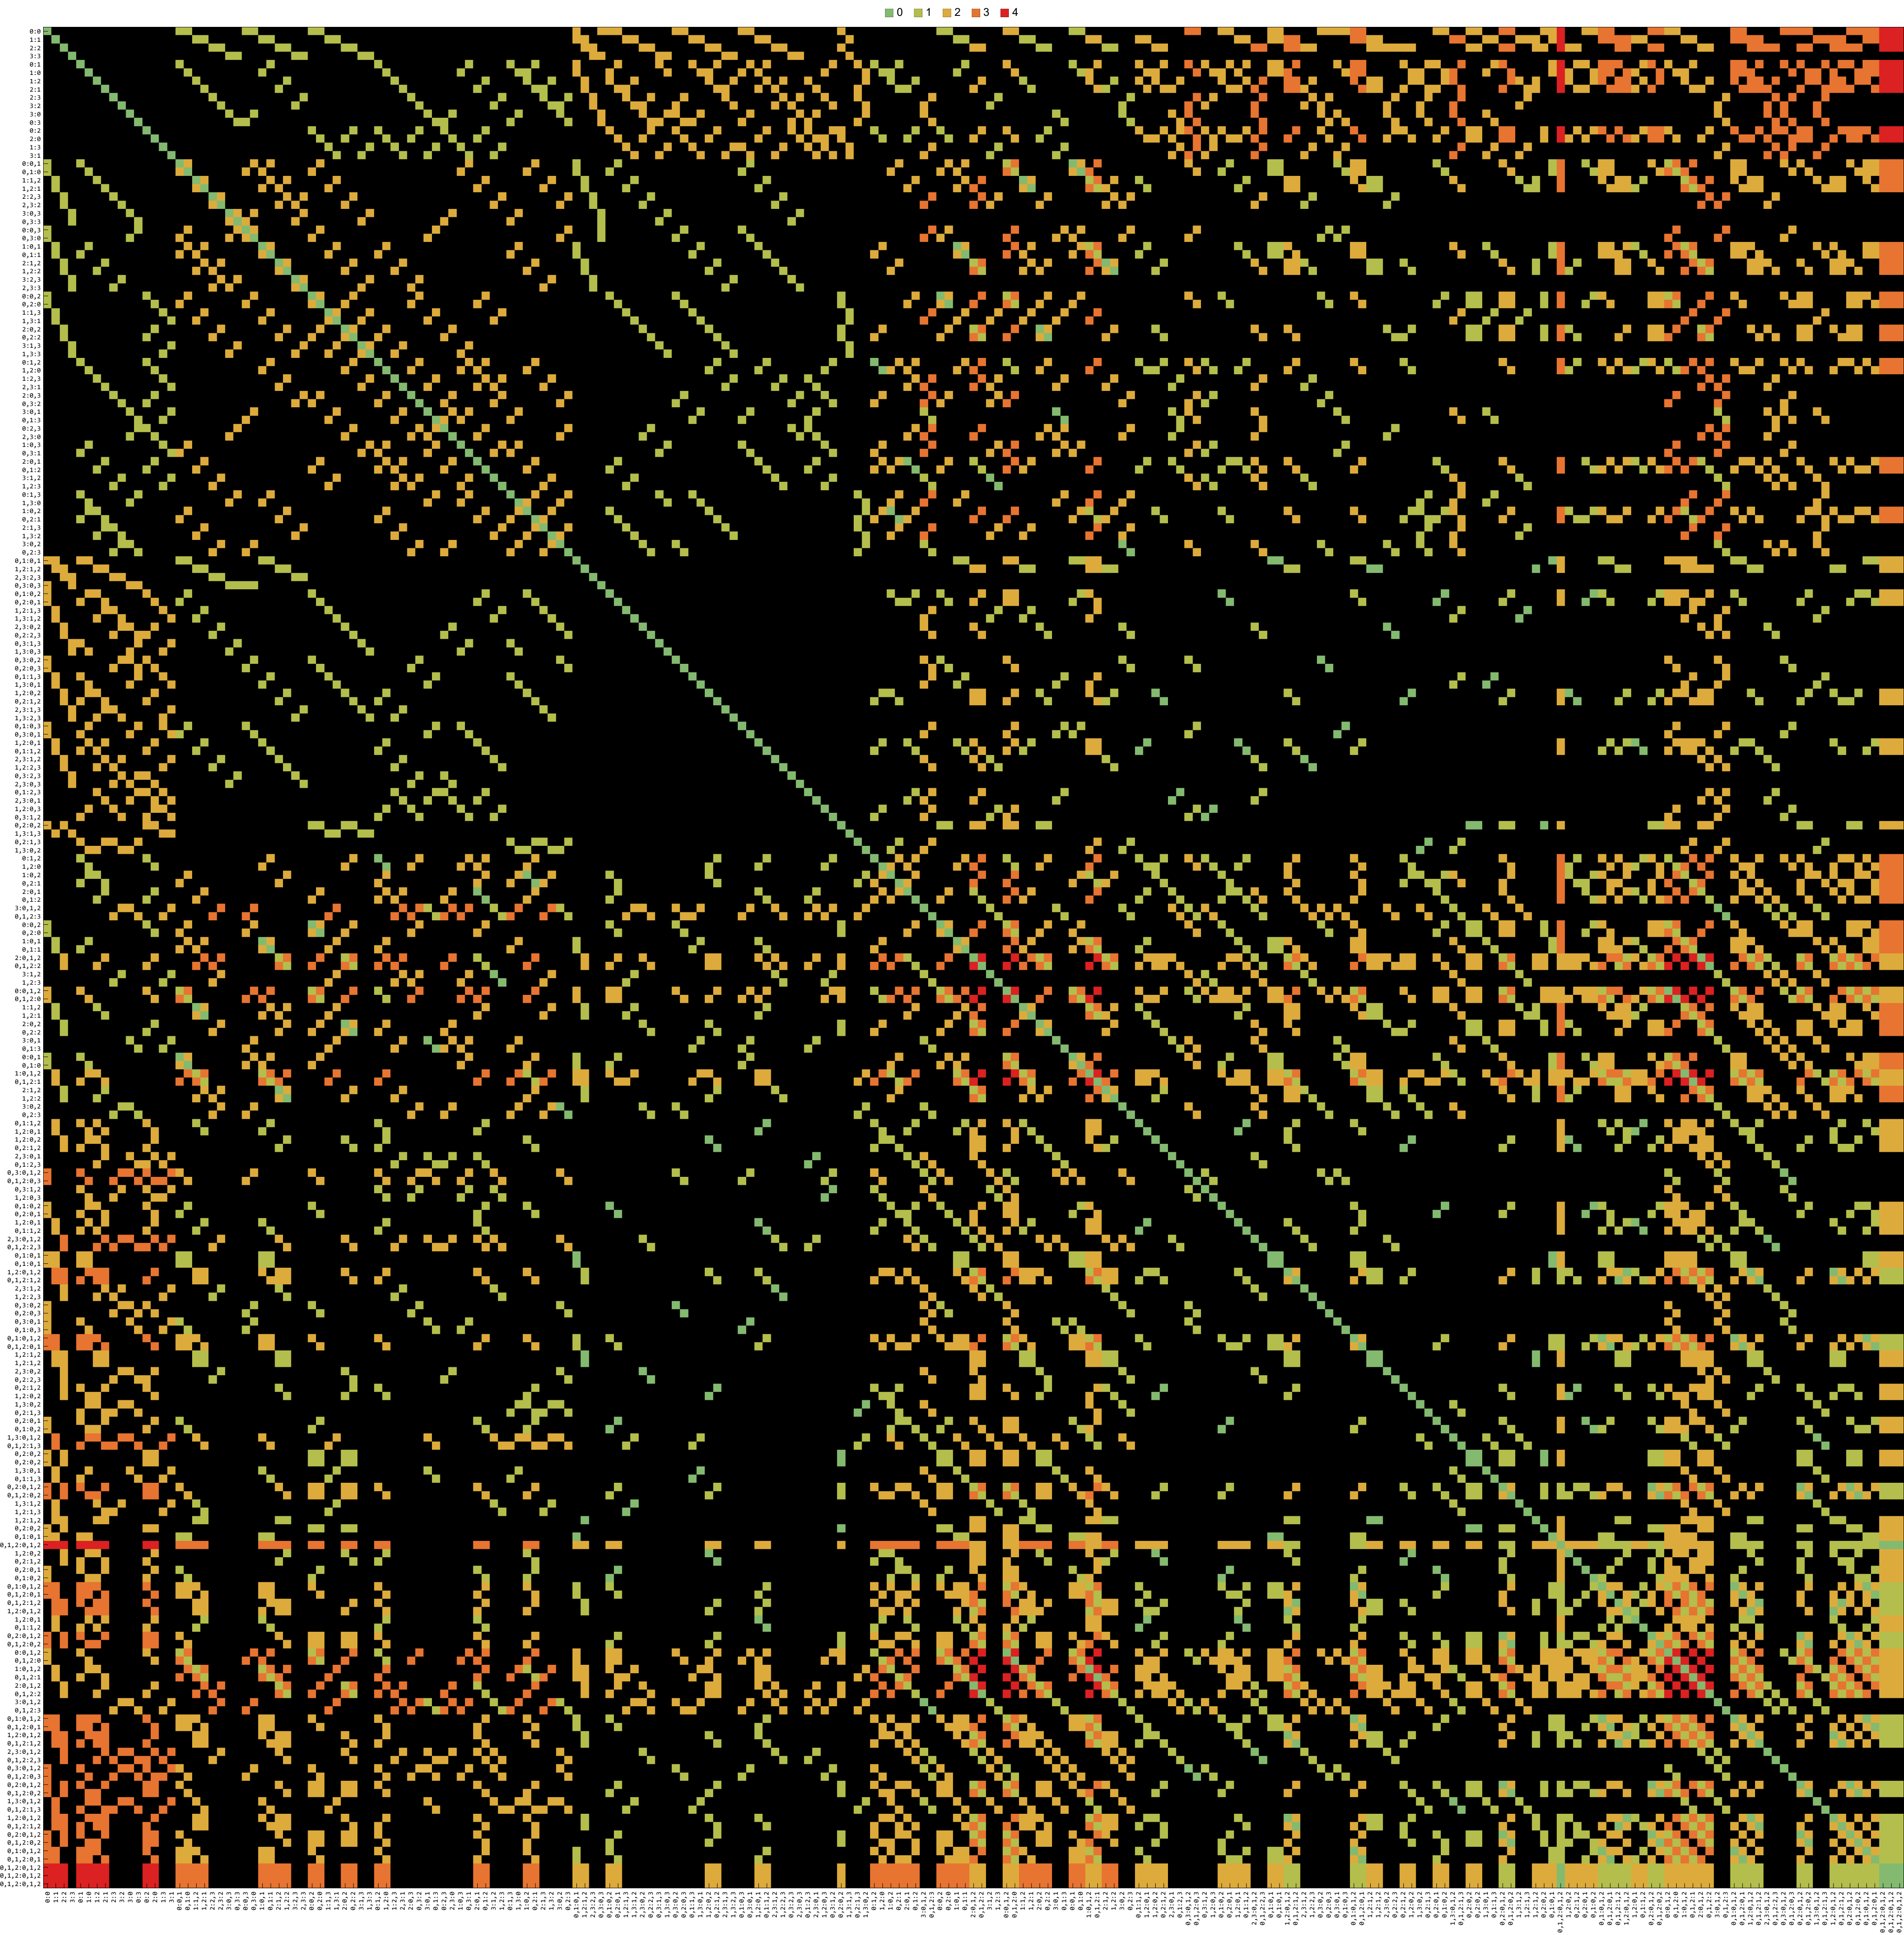

Supplement: d5sc08813e1.zip [file S4B2 motions order plot.pdf › publication files/motions order outputs/S4B2 motions order plot.pdf]

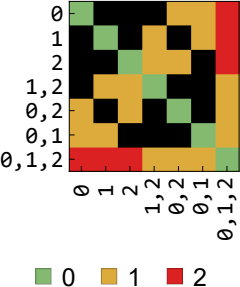

Supplement: d5sc08813e1.zip [file S3B1 motions order plot.pdf › publication files/species/S3B1 motions order plot.pdf]

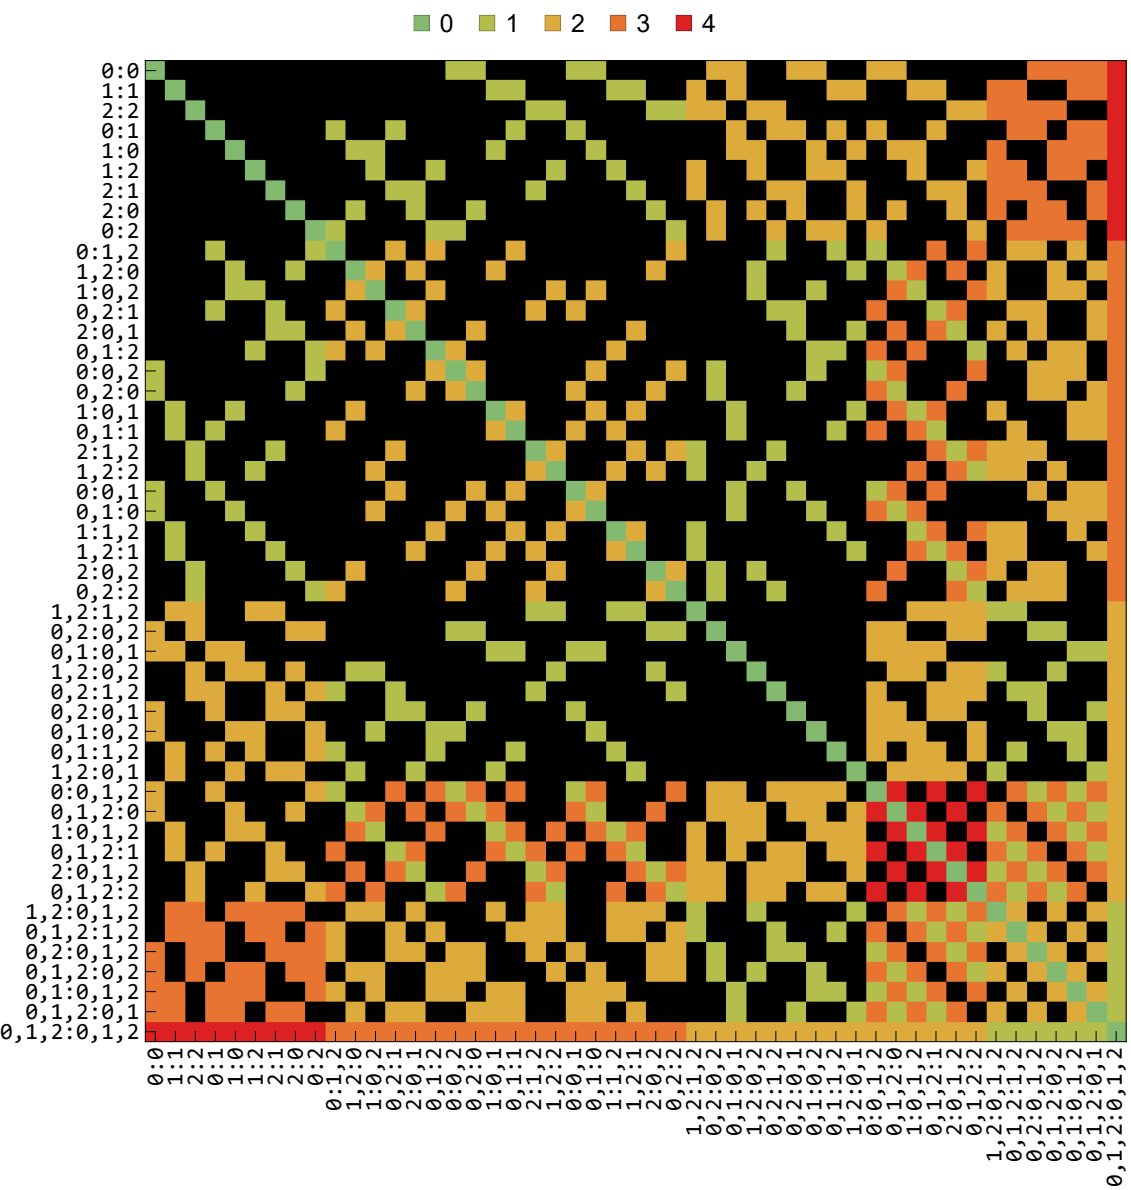

Supplement: d5sc08813e1.zip [file S3B2 motions order plot.pdf › publication files/species/S3B2 motions order plot.pdf]

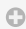

$\delta x$

$\delta y$

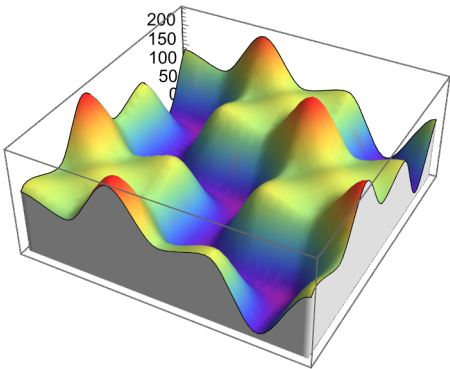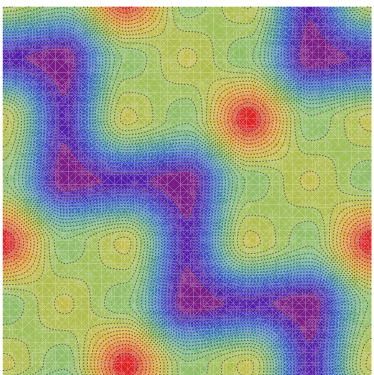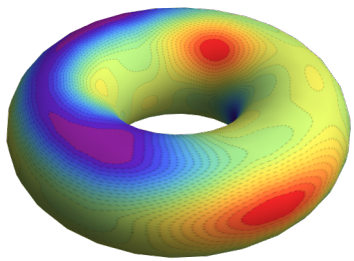

Supplement: d5sc08813e1.zip [file ss.pdf › publication files/species/ss.pdf]
